# Supplementary material for: Identification of prognostic biomarkers and correlations with immune infiltrates among cGAS-STING in hepatocellular carcinoma
Source: PubMed Central journal article supplement (PMC7569205; doi:10.1042/bsr20202603), 2020-10-16
Supplement: BSR-2020-2603_supp.pdf [file BSR-2020-2603_supp.pdf]

**Supplementary Table 1 Correlation analysis among XRCC5, IRF3, TRIM21, and IFI16 and related genes and markers of immune cells in TIMER.**

| Description      | Gene Markers | XRCC5 |       |        |     | IRF3   |       |        |       | TRIM21 |     |        |     | IFI16 |     |        |     |
|------------------|--------------|-------|-------|--------|-----|--------|-------|--------|-------|--------|-----|--------|-----|-------|-----|--------|-----|
|                  |              | None  |       | Purity |     | None   |       | Purity |       | None   |     | Purity |     | None  |     | Purity |     |
|                  |              | Cor   | P     | Cor    | P   | Cor    | P     | Cor    | P     | Cor    | P   | Cor    | P   | Cor   | P   | Cor    | P   |
| CD8+ T cell      | CD8A         | 0.179 | ***   | 0.253  | *** | 0.202  | ***   | 0.231  | ***   | 0.330  | *** | 0.279  | *** | 0.579 | *** | 0.458  | *** |
|                  | CD8B         | 0.118 | *     | 0.185  | *** | 0.290  | ***   | 0.321  | ***   | 0.256  | *** | 0.204  | *** | 0.475 | *** | 0.340  | *** |
| T cell (general) | CD3D         | 0.111 | *     | 0.178  | *** | 0.413  | ***   | 0.458  | ***   | 0.350  | *** | 0.328  | *** | 0.515 | *** | 0.388  | *** |
|                  | CD3E         | 0.146 | **    | 0.241  | *** | 0.267  | ***   | 0.329  | ***   | 0.372  | *** | 0.334  | *** | 0.642 | *** | 0.517  | *** |
|                  | CD2          | 0.131 | *     | 0.220  | *** | 0.320  | ***   | 0.377  | ***   | 0.388  | *** | 0.358  | *** | 0.610 | *** | 0.485  | *** |
| B cell           | CD19         | 0.165 | **    | 0.192  | *** | 0.307  | ***   | 0.325  | ***   | 0.270  | *** | 0.213  | *** | 0.437 | *** | 0.328  | *** |
|                  | CD79A        | 0.066 | 0.205 | 0.130  | *   | 0.266  | ***   | 0.293  | ***   | 0.241  | *** | 0.161  | **  | 0.535 | *** | 0.402  | *** |
| Monocyte         | CD86         | 0.322 | ***   | 0.430  | *** | 0.254  | ***   | 0.301  | ***   | 0.451  | *** | 0.426  | *** | 0.692 | *** | 0.588  | *** |
| TAM              | CSF1R        | 0.277 | ***   | 0.381  | *** | 0.181  | ***   | 0.217  | ***   | 0.439  | *** | 0.403  | *** | 0.682 | *** | 0.568  | *** |
|                  | CCL2         | 0.186 | ***   | 0.255  | *** | 0.109  | *     | 0.126  | *     | 0.383  | *** | 0.341  | *** | 0.635 | *** | 0.523  | *** |
|                  | CD68         | 0.246 | ***   | 0.309  | *** | 0.157  | **    | 0.172  | **    | 0.328  | *** | 0.281  | *** | 0.484 | *** | 0.349  | *** |
|                  | IL10         | 0.264 | ***   | 0.339  | *** | 0.127  | *     | 0.151  | **    | 0.313  | *** | 0.248  | *** | 0.551 | *** | 0.425  | *** |
| M1 Macrophage    | NOS2         | 0.150 | **    | 0.155  | *** | -0.132 | *     | -0.122 | *     | 0.151  | **  | 0.134  | *   | 0.241 | *** | 0.232  | *** |
|                  | IRF5         | 0.393 | ***   | 0.382  | *** | 0.325  | ***   | 0.324  | ***   | 0.416  | *** | 0.436  | *** | 0.247 | *** | 0.275  | *** |
|                  | PTGS2        | 0.317 | ***   | 0.419  | *** | 0.087  | 0.096 | 0.106  | 0.050 | 0.312  | *** | 0.255  | *** | 0.622 | *** | 0.503  | *** |

|                        |          |       |       |       |       |        |       |        |       |        |       |        |       |       |     |       |       |
|------------------------|----------|-------|-------|-------|-------|--------|-------|--------|-------|--------|-------|--------|-------|-------|-----|-------|-------|
| M2<br>Macrophage       | CD163    | 0.253 | ***   | 0.334 | ***   | -0.03  | 0.562 | -0.022 | 0.683 | 0.409  | ***   | 0.362  | ***   | 0.557 | *** | 0.426 | ***   |
|                        | VSIG4    | 0.230 | ***   | 0.308 | ***   | 0.069  | 0.188 | 0.094  | 0.081 | 0.433  | ***   | 0.399  | ***   | 0.576 | *** | 0.450 | ***   |
|                        | MS4A4A   | 0.230 | ***   | 0.325 | ***   | 0.028  | 0.594 | 0.051  | 0.349 | 0.424  | ***   | 0.401  | ***   | 0.633 | *** | 0.516 | ***   |
| Neutrophils            | CEACAM8  | 0.084 | 0.106 | 0.095 | 0.079 | 0.033  | 0.523 | 0.051  | 0.341 | -0.016 | 0.756 | -0.027 | 0.620 | 0.108 | *   | 0.078 | 0.149 |
|                        | ITGAM    | 0.273 | ***   | 0.319 | ***   | 0.248  | ***   | 0.273  | ***   | 0.467  | ***   | 0.460  | ***   | 0.569 | *** | 0.492 | ***   |
|                        | CCR7     | 0.134 | **    | 0.215 | ***   | 0.143  | **    | 0.180  | ***   | 0.312  | ***   | 0.247  | ***   | 0.593 | *** | 0.451 | ***   |
| Natural<br>killer cell | KIR2DL1  | 0.052 | 0.317 | 0.026 | 0.627 | -0.068 | 0.189 | -0.094 | 0.081 | 0.008  | 0.875 | -0.034 | 0.534 | 0.144 | **  | 0.118 | *     |
|                        | KIR2DL3  | 0.160 | **    | 0.188 | ***   | 0.126  | *     | 0.140  | **    | 0.252  | ***   | 0.214  | ***   | 0.290 | *** | 0.246 | ***   |
|                        | KIR2DL4  | 0.157 | **    | 0.175 | **    | 0.194  | ***   | 0.207  | ***   | 0.315  | ***   | 0.291  | ***   | 0.376 | *** | 0.334 | ***   |
|                        | KIR3DL1  | 0.132 | *     | 0.146 | **    | -0.048 | 0.356 | -0.074 | 0.170 | 0.117  | *     | 0.074  | 0.170 | 0.207 | *** | 0.180 | ***   |
|                        | KIR3DL2  | 0.121 | *     | 0.157 | **    | 0.128  | *     | 0.141  | **    | 0.126  | *     | 0.086  | 0.110 | 0.280 | *** | 0.204 | ***   |
|                        | KIR3DL3  | 0.075 | 0.148 | 0.076 | 0.159 | 0.012  | 0.821 | -0.01  | 0.852 | 0.024  | 0.646 | -0.006 | 0.906 | 0.121 | *   | 0.085 | 0.113 |
|                        | KIR2DS4  | 0.176 | ***   | 0.185 | ***   | 0.018  | 0.734 | 0.031  | 0.566 | 0.051  | 0.326 | 0.061  | 0.257 | 0.166 | **  | 0.195 | ***   |
| Dendritic<br>cell      | HLA-DPB1 | 0.232 | ***   | 0.309 | ***   | 0.218  | ***   | 0.249  | ***   | 0.447  | ***   | 0.416  | ***   | 0.709 | *** | 0.614 | ***   |
|                        | HLA-DQB1 | 0.153 | **    | 0.219 | ***   | 0.242  | ***   | 0.264  | ***   | 0.364  | ***   | 0.334  | ***   | 0.576 | *** | 0.456 | ***   |
|                        | HLA-DRA  | 0.266 | ***   | 0.346 | ***   | 0.148  | **    | 0.170  | **    | 0.513  | ***   | 0.489  | ***   | 0.708 | *** | 0.613 | ***   |
|                        | HLA-DPA1 | 0.275 | ***   | 0.361 | ***   | 0.130  | *     | 0.159  | **    | 0.487  | ***   | 0.466  | ***   | 0.719 | *** | 0.629 | ***   |
|                        | CD1C     | 0.258 | ***   | 0.320 | ***   | 0.158  | **    | 0.170  | **    | 0.282  | ***   | 0.240  | ***   | 0.523 | *** | 0.416 | ***   |
|                        | NRP1     | 0.532 | ***   | 0.552 | ***   | 0.053  | 0.312 | 0.049  | 0.362 | 0.243  | ***   | 0.221  | ***   | 0.457 | *** | 0.433 | ***   |
|                        | ITGAX    | 0.294 | ***   | 0.377 | ***   | 0.284  | ***   | 0.333  | ***   | 0.421  | ***   | 0.398  | ***   | 0.619 | *** | 0.518 | ***   |
| Th1                    | TBX21    | 0.141 | **    | 0.208 | ***   | 0.137  | **    | 0.170  | **    | 0.302  | ***   | 0.240  | ***   | 0.496 | *** | 0.366 | ***   |

|                      |        |       |       |       |       |        |       |        |       |       |       |       |       |       |     |       |     |
|----------------------|--------|-------|-------|-------|-------|--------|-------|--------|-------|-------|-------|-------|-------|-------|-----|-------|-----|
|                      | STAT4  | 0.228 | ***   | 0.270 | ***   | 0.256  | ***   | 0.248  | ***   | 0.395 | ***   | 0.372 | ***   | 0.506 | *** | 0.451 | *** |
|                      | STAT1  | 0.488 | ***   | 0.526 | ***   | 0.277  | ***   | 0.279  | ***   | 0.576 | ***   | 0.552 | ***   | 0.561 | *** | 0.535 | *** |
|                      | IFNG   | 0.140 | **    | 0.191 | ***   | 0.268  | ***   | 0.297  | ***   | 0.303 | ***   | 0.276 | ***   | 0.399 | *** | 0.302 | *** |
|                      | TNF    | 0.258 | ***   | 0.346 | ***   | 0.271  | ***   | 0.315  | ***   | 0.422 | ***   | 0.391 | ***   | 0.543 | *** | 0.439 | *** |
| Th2                  | GATA3  | 0.223 | ***   | 0.326 | ***   | 0.190  | ***   | 0.225  | ***   | 0.349 | ***   | 0.298 | ***   | 0.627 | *** | 0.532 | *** |
|                      | STAT6  | 0.380 | ***   | 0.365 | ***   | 0.024  | 0.645 | 0.012  | 0.821 | 0.312 | ***   | 0.289 | ***   | 0.239 | *** | 0.261 | *** |
|                      | STAT5A | 0.352 | ***   | 0.389 | ***   | 0.309  | ***   | 0.315  | ***   | 0.324 | ***   | 0.295 | ***   | 0.526 | *** | 0.454 | *** |
|                      | IL13   | 0.074 | 0.153 | 0.062 | 0.252 | 0.156  | **    | 0.150  | **    | 0.168 | **    | 0.144 | **    | 0.134 | **  | 0.113 | *   |
| Tfh                  | BCL6   | 0.361 | ***   | 0.353 | ***   | 0.046  | 0.380 | 0.066  | 0.220 | 0.142 | **    | 0.152 | **    | 0.194 | *** | 0.246 | *** |
|                      | IL21   | 0.078 | 0.132 | 0.116 | *     | 0.099  | 0.056 | 0.125  | *     | 0.150 | **    | 0.142 | **    | 0.168 | **  | 0.136 | *   |
| Th17                 | STAT3  | 0.321 | ***   | 0.344 | ***   | -0.016 | 0.759 | -0.01  | 0.856 | 0.443 | ***   | 0.420 | ***   | 0.519 | *** | 0.487 | *** |
|                      | IL17A  | 0.094 | 0.070 | 0.108 | *     | -0.005 | 0.921 | 0.014  | 0.793 | 0.042 | 0.421 | 0.048 | 0.374 | 0.137 | **  | 0.146 | **  |
| Treg                 | FOXP3  | 0.242 | ***   | 0.274 | ***   | -0.046 | 0.375 | -0.016 | 0.773 | 0.378 | ***   | 0.362 | ***   | 0.330 | *** | 0.270 | *** |
|                      | CCR8   | 0.386 | ***   | 0.458 | ***   | 0.134  | **    | 0.147  | **    | 0.428 | ***   | 0.400 | ***   | 0.579 | *** | 0.519 | *** |
|                      | STAT5B | 0.500 | ***   | 0.490 | ***   | -0.063 | 0.227 | -0.063 | 0.244 | 0.251 | ***   | 0.296 | ***   | 0.128 | *   | 0.243 | *** |
|                      | TGFB1  | 0.319 | ***   | 0.398 | ***   | 0.362  | ***   | 0.392  | ***   | 0.284 | ***   | 0.225 | ***   | 0.539 | *** | 0.422 | *** |
| T cell<br>exhaustion | PDCD1  | 0.183 | ***   | 0.245 | ***   | 0.402  | ***   | 0.442  | ***   | 0.300 | ***   | 0.252 | ***   | 0.497 | *** | 0.380 | *** |
|                      | CTLA4  | 0.155 | **    | 0.218 | ***   | 0.410  | ***   | 0.454  | ***   | 0.299 | ***   | 0.267 | ***   | 0.496 | *** | 0.375 | *** |
|                      | LAG3   | 0.149 | **    | 0.177 | ***   | 0.355  | ***   | 0.361  | ***   | 0.272 | ***   | 0.238 | ***   | 0.303 | *** | 0.212 | *** |
|                      | HAVCR2 | 0.303 | ***   | 0.411 | ***   | 0.283  | ***   | 0.338  | ***   | 0.437 | ***   | 0.409 | ***   | 0.703 | *** | 0.606 | *** |
|                      | GZMB   | 0.107 | *     | 0.130 | *     | 0.184  | ***   | 0.215  | ***   | 0.132 | *     | 0.052 | 0.334 | 0.417 | *** | 0.305 | *** |

**Supplementary Table 2 Correlation analysis among STAT6, NLRC3, DDX41, and TBK1 and related genes and markers of immune cells in TIMER.**

| Description      | Gene Markers | STAT6  |       |        |       | NLRC3 |     |        |     | DDX41  |       |        |       | TBK1  |       |        |       |
|------------------|--------------|--------|-------|--------|-------|-------|-----|--------|-----|--------|-------|--------|-------|-------|-------|--------|-------|
|                  |              | None   |       | Purity |       | None  |     | Purity |     | None   |       | Purity |       | None  |       | Purity |       |
|                  |              | Cor    | P     | Cor    | P     | Cor   | P   | Cor    | P   | Cor    | P     | Cor    | P     | Cor   | P     | Cor    | P     |
| CD8+ T cell      | CD8A         | 0.131  | *     | 0.151  | **    | 0.737 | *** | 0.675  | *** | 0.045  | 0.388 | 0.100  | 0.064 | 0.197 | ***   | 0.211  | ***   |
|                  | CD8B         | 0.002  | 0.966 | 0.012  | 0.829 | 0.612 | *** | 0.528  | *** | 0.027  | 0.609 | 0.074  | 0.172 | 0.068 | 0.191 | 0.075  | 0.162 |
| T cell (general) | CD3D         | -0.006 | 0.906 | 0.004  | 0.946 | 0.627 | *** | 0.539  | *** | 0.032  | 0.538 | 0.093  | 0.085 | 0.096 | 0.066 | 0.107  | *     |
|                  | CD3E         | 0.103  | *     | 0.126  | *     | 0.797 | *** | 0.732  | *** | 0.002  | 0.971 | 0.067  | 0.214 | 0.166 | **    | 0.188  | ***   |
|                  | CD2          | 0.085  | 0.101 | 0.111  | *     | 0.783 | *** | 0.721  | *** | -0.004 | 0.943 | 0.057  | 0.293 | 0.154 | **    | 0.179  | ***   |
| B cell           | CD19         | 0.093  | 0.074 | 0.077  | 0.151 | 0.528 | *** | 0.427  | *** | 0.072  | 0.164 | 0.092  | 0.088 | 0.174 | ***   | 0.162  | **    |
|                  | CD79A        | 0.025  | 0.626 | 0.023  | 0.670 | 0.642 | *** | 0.526  | *** | -0.039 | 0.450 | 0.003  | 0.953 | 0.071 | 0.175 | 0.064  | 0.235 |
| Monocyte         | CD86         | 0.163  | **    | 0.190  | ***   | 0.726 | *** | 0.637  | *** | 0.146  | **    | 0.227  | ***   | 0.350 | ***   | 0.410  | ***   |
|                  | CSF1R        | 0.205  | ***   | 0.236  | ***   | 0.699 | *** | 0.595  | *** | 0.137  | **    | 0.216  | ***   | 0.303 | ***   | 0.358  | ***   |
| TAM              | CCL2         | 0.165  | **    | 0.188  | ***   | 0.617 | *** | 0.487  | *** | 0.047  | 0.371 | 0.129  | *     | 0.268 | ***   | 0.314  | ***   |
|                  | CD68         | 0.146  | **    | 0.156  | **    | 0.494 | *** | 0.358  | *** | 0.079  | 0.127 | 0.128  | *     | 0.289 | ***   | 0.314  | ***   |
|                  | IL10         | 0.135  | **    | 0.138  | *     | 0.584 | *** | 0.451  | *** | 0.078  | 0.136 | 0.122  | *     | 0.311 | ***   | 0.340  | ***   |
| M1 Macrophage    | NOS2         | 0.216  | ***   | 0.216  | ***   | 0.235 | *** | 0.216  | *** | 0.093  | 0.075 | 0.104  | 0.054 | 0.243 | ***   | 0.244  | ***   |
|                  | IRF5         | 0.366  | ***   | 0.362  | ***   | 0.355 | *** | 0.395  | *** | 0.417  | ***   | 0.410  | ***   | 0.463 | ***   | 0.469  | ***   |
|                  | PTGS2        | 0.199  | ***   | 0.233  | ***   | 0.623 | *** | 0.506  | *** | 0.003  | 0.949 | 0.083  | 0.125 | 0.367 | ***   | 0.437  | ***   |
| M2 Macrophage    | CD163        | 0.204  | ***   | 0.225  | ***   | 0.627 | *** | 0.512  | *** | 0.053  | 0.307 | 0.097  | 0.071 | 0.359 | ***   | 0.412  | ***   |

|                        |          |        |       |        |       |       |       |       |       |        |       |        |       |       |       |       |       |
|------------------------|----------|--------|-------|--------|-------|-------|-------|-------|-------|--------|-------|--------|-------|-------|-------|-------|-------|
|                        | VSIG4    | 0.194  | ***   | 0.231  | ***   | 0.565 | ***   | 0.436 | ***   | 0.111  | *     | 0.176  | **    | 0.322 | ***   | 0.385 | ***   |
|                        | MS4A4A   | 0.199  | ***   | 0.238  | ***   | 0.627 | ***   | 0.502 | ***   | 0.060  | 0.251 | 0.133  | *     | 0.307 | ***   | 0.363 | ***   |
| Neutrophils            | CEACAM8  | -0.045 | 0.388 | -0.047 | 0.379 | 0.061 | 0.243 | 0.028 | 0.606 | -0.029 | 0.580 | -0.019 | 0.720 | 0.105 | *     | 0.117 | *     |
|                        | ITGAM    | 0.259  | ***   | 0.284  | ***   | 0.529 | ***   | 0.448 | ***   | 0.297  | ***   | 0.356  | ***   | 0.418 | ***   | 0.476 | ***   |
|                        | CCR7     | 0.120  | *     | 0.121  | *     | 0.725 | ***   | 0.622 | ***   | -0.085 | 0.104 | -0.04  | 0.459 | 0.184 | ***   | 0.198 | ***   |
| Natural<br>killer cell | KIR2DL1  | 0.074  | 0.153 | 0.044  | 0.418 | 0.183 | ***   | 0.153 | **    | -0.04  | 0.442 | -0.068 | 0.210 | 0.053 | 0.312 | 0.031 | 0.570 |
|                        | KIR2DL3  | 0.182  | ***   | 0.177  | ***   | 0.364 | ***   | 0.333 | ***   | 0.144  | **    | 0.187  | ***   | 0.176 | ***   | 0.174 | **    |
|                        | KIR2DL4  | 0.127  | *     | 0.132  | *     | 0.373 | ***   | 0.328 | ***   | 0.129  | *     | 0.148  | **    | 0.171 | ***   | 0.175 | **    |
|                        | KIR3DL1  | 0.222  | ***   | 0.225  | ***   | 0.317 | ***   | 0.311 | ***   | -0.013 | 0.807 | ***    | 0.998 | 0.146 | **    | 0.157 | **    |
|                        | KIR3DL2  | 0.064  | 0.222 | 0.082  | 0.126 | 0.389 | ***   | 0.347 | ***   | 0.070  | 0.182 | 0.089  | 0.099 | 0.088 | 0.089 | 0.101 | 0.062 |
|                        | KIR3DL3  | 0.083  | 0.109 | 0.043  | 0.426 | 0.167 | **    | 0.137 | *     | 0.059  | 0.257 | 0.031  | 0.561 | 0.040 | 0.444 | -0.01 | 0.853 |
|                        | KIR2DS4  | 0.210  | ***   | 0.218  | ***   | 0.276 | ***   | 0.319 | ***   | 0.063  | 0.225 | 0.057  | 0.292 | 0.104 | *     | 0.109 | *     |
| Dendritic<br>cell      | HLA-DPB1 | 0.163  | **    | 0.183  | ***   | 0.728 | ***   | 0.640 | ***   | 0.124  | *     | 0.184  | ***   | 0.205 | ***   | 0.229 | ***   |
|                        | HLA-DQB1 | 0.056  | 0.279 | 0.066  | 0.219 | 0.592 | ***   | 0.482 | ***   | 0.103  | *     | 0.160  | **    | 0.109 | *     | 0.125 | *     |
|                        | HLA-DRA  | 0.213  | ***   | 0.236  | ***   | 0.729 | ***   | 0.640 | ***   | 0.118  | *     | 0.182  | ***   | 0.301 | ***   | 0.339 | ***   |
|                        | HLA-DPA1 | 0.206  | ***   | 0.225  | ***   | 0.748 | ***   | 0.667 | ***   | 0.111  | *     | 0.179  | ***   | 0.299 | ***   | 0.340 | ***   |
|                        | CD1C     | 0.144  | **    | 0.153  | **    | 0.658 | ***   | 0.580 | ***   | -0.002 | 0.970 | 0.054  | 0.315 | 0.208 | ***   | 0.226 | ***   |
|                        | NRP1     | 0.458  | ***   | -0.003 | 0.957 | 0.517 | ***   | 0.506 | ***   | 0.135  | **    | 0.165  | **    | 0.534 | ***   | 0.546 | ***   |
|                        | ITGAX    | 0.218  | ***   | 0.245  | ***   | 0.683 | ***   | 0.588 | ***   | 0.172  | ***   | 0.235  | ***   | 0.392 | ***   | 0.442 | ***   |
| Th1                    | TBX21    | 0.160  | **    | 0.174  | **    | 0.727 | ***   | 0.655 | ***   | -0.068 | 0.194 | -0.03  | 0.572 | 0.166 | **    | 0.175 | **    |
|                        | STAT4    | 0.159  | **    | 0.173  | **    | 0.565 | ***   | 0.522 | ***   | 0.012  | 0.816 | 0.044  | 0.411 | 0.242 | ***   | 0.260 | ***   |
|                        | STAT1    | 0.326  | ***   | 0.324  | ***   | 0.600 | ***   | 0.587 | ***   | 0.194  | ***   | 0.210  | ***   | 0.514 | ***   | 0.518 | ***   |
|                        | IFNG     | 0.029  | 0.583 | 0.044  | 0.410 | 0.514 | ***   | 0.450 | ***   | 0.126  | *     | 0.170  | **    | 0.171 | ***   | 0.191 | ***   |
|                        | TNF      | 0.163  | **    | 0.183  | ***   | 0.666 | ***   | 0.577 | ***   | 0.091  | *     | 0.150  | **    | 0.316 | ***   | 0.349 | ***   |

|                      |        |        |       |        |       |       |     |       |     |        |       |       |       |       |       |       |       |
|----------------------|--------|--------|-------|--------|-------|-------|-----|-------|-----|--------|-------|-------|-------|-------|-------|-------|-------|
| Th2                  | GATA3  | 0.142  | **    | 0.178  | ***   | 0.769 | *** | 0.704 | *** | 0.036  | 0.491 | 0.093 | 0.083 | 0.256 | ***   | 0.304 | ***   |
|                      | STAT6  | 1.000  | ***   | -1     | ***   | 0.326 | *** | 0.360 | *** | 0.143  | **    | 0.120 | *     | 0.542 | ***   | 0.518 | ***   |
|                      | STAT5A | 0.330  | ***   | 0.346  | ***   | 0.573 | *** | 0.531 | *** | 0.202  | ***   | 0.220 | ***   | 0.394 | ***   | 0.411 | ***   |
|                      | IL13   | -0.054 | 0.303 | -0.084 | 0.118 | 0.179 | *** | 0.163 | **  | 0.106  | *     | 0.077 | 0.155 | 0.108 | *     | 0.105 | 0.052 |
| Tfh                  | BCL6   | 0.374  | ***   | 0.368  | ***   | 0.199 | *** | 0.239 | *** | 0.118  | *     | 0.111 | *     | 0.427 | ***   | 0.431 | ***   |
|                      | IL21   | 0.046  | 0.378 | 0.065  | 0.232 | 0.235 | *** | 0.212 | *** | 0.013  | 0.801 | 0.037 | 0.495 | 0.140 | **    | 0.154 | **    |
| Th17                 | STAT3  | 0.339  | ***   | 0.330  | ***   | 0.423 | *** | 0.354 | *** | 0.095  | 0.068 | 0.101 | 0.060 | 0.556 | ***   | 0.571 | ***   |
|                      | IL17A  | 0.159  | **    | 0.163  | **    | 0.156 | **  | 0.163 | **  | -0.067 | 0.195 | -0.05 | 0.351 | 0.122 | *     | 0.115 | *     |
| Treg                 | FOXP3  | 0.168  | **    | 0.155  | **    | 0.470 | *** | 0.425 | *** | 0.083  | 0.110 | 0.135 | *     | 0.358 | ***   | 0.370 | ***   |
|                      | CCR8   | 0.276  | ***   | 0.294  | ***   | 0.663 | *** | 0.612 | *** | 0.144  | **    | 0.181 | ***   | 0.512 | ***   | 0.551 | ***   |
|                      | STAT5B | 0.496  | ***   | 0.486  | ***   | 0.309 | *** | 0.456 | *** | 0.244  | ***   | 0.217 | ***   | 0.648 | ***   | 0.660 | ***   |
|                      | TGFB1  | 0.140  | **    | 0.152  | **    | 0.563 | *** | 0.455 | *** | 0.176  | ***   | 0.253 | ***   | 0.250 | ***   | 0.274 | ***   |
| T cell<br>exhaustion | PDCD1  | 0.068  | 0.194 | 0.063  | 0.240 | 0.607 | *** | 0.518 | *** | 0.108  | *     | 0.171 | **    | 0.155 | **    | 0.146 | **    |
|                      | CTLA4  | 0.034  | 0.514 | 0.045  | 0.407 | 0.587 | *** | 0.495 | *** | 0.084  | 0.108 | 0.147 | **    | 0.147 | **    | 0.161 | **    |
|                      | LAG3   | -0.004 | 0.931 | -0.004 | 0.935 | 0.456 | *** | 0.407 | *** | 0.033  | 0.530 | 0.046 | 0.389 | 0.083 | 0.109 | 0.079 | 0.141 |
|                      | HAVCR2 | 0.140  | **    | 0.169  | **    | 0.699 | *** | 0.601 | *** | 0.151  | **    | 0.228 | ***   | 0.333 | ***   | 0.397 | ***   |
|                      | GZMB   | 0.079  | 0.129 | 0.058  | 0.282 | 0.497 | *** | 0.394 | *** | 0.021  | 0.689 | 0.066 | 0.222 | 0.069 | 0.184 | 0.048 | 0.374 |

**Supplementary Table 3 Correlation analysis among XRCC6, TREX1, and PRKDC, and related genes and markers of immune cells in TIMER.**

| Description         | Gene Markers | XRCC6  |       |        |       | TREX1  |       |        |       | PRKDC |       |        |       |
|---------------------|--------------|--------|-------|--------|-------|--------|-------|--------|-------|-------|-------|--------|-------|
|                     |              | None   |       | Purity |       | None   |       | Purity |       | None  |       | Purity |       |
|                     |              | Cor    | P     | Cor    | P     | Cor    | P     | Cor    | P     | Cor   | P     | Cor    | P     |
| CD8+ T cell         | CD8A         | 0.132  | *     | 0.216  | ***   | 0.154  | **    | 0.076  | 0.157 | 0.166 | **    | 0.184  | ***   |
|                     | CD8B         | 0.128  | *     | 0.216  | ***   | 0.157  | **    | 0.085  | 0.113 | 0.083 | 0.109 | 0.097  | 0.071 |
| T cell (general)    | CD3D         | 0.153  | **    | 0.243  | ***   | 0.116  | *     | 0.036  | 0.507 | 0.139 | **    | 0.159  | **    |
|                     | CD3E         | 0.122  | *     | 0.235  | ***   | 0.112  | *     | 0.006  | 0.915 | 0.183 | ***   | 0.215  | ***   |
|                     | CD2          | 0.124  | *     | 0.233  | ***   | 0.123  | *     | 0.027  | 0.617 | 0.172 | ***   | 0.208  | ***   |
| B cell              | CD19         | 0.205  | ***   | 0.257  | ***   | 0.113  | *     | 0.035  | 0.512 | 0.205 | ***   | 0.199  | ***   |
|                     | CD79A        | 0.098  | 0.060 | 0.199  | ***   | 0.067  | 0.201 | -0.041 | 0.453 | 0.117 | *     | 0.127  | *     |
| Monocyte            | CD86         | 0.322  | ***   | 0.454  | ***   | 0.177  | ***   | 0.100  | 0.063 | 0.357 | ***   | 0.417  | ***   |
|                     | CSF1R        | 0.265  | ***   | 0.388  | ***   | 0.227  | ***   | 0.150  | **    | 0.301 | ***   | 0.353  | ***   |
| TAM                 | CCL2         | 0.125  | *     | 0.199  | ***   | 0.253  | ***   | 0.195  | ***   | 0.182 | ***   | 0.189  | ***   |
|                     | CD68         | 0.269  | ***   | 0.357  | ***   | 0.101  | 0.052 | 0.019  | 0.725 | 0.344 | ***   | 0.378  | ***   |
|                     | IL10         | 0.211  | ***   | 0.299  | ***   | 0.171  | ***   | 0.092  | 0.088 | 0.289 | ***   | 0.313  | ***   |
| M1 Macrophage       | NOS2         | 0.035  | 0.500 | 0.044  | 0.420 | 0.141  | **    | 0.125  | 0.020 | 0.165 | **    | 0.165  | **    |
|                     | IRF5         | 0.371  | ***   | 0.375  | ***   | 0.142  | **    | 0.130  | 0.015 | 0.433 | ***   | 0.417  | ***   |
|                     | PTGS2        | 0.161  | **    | 0.247  | ***   | 0.160  | **    | 0.093  | 0.086 | 0.284 | ***   | 0.317  | ***   |
| M2 Macrophage       | CD163        | 0.181  | ***   | 0.271  | ***   | 0.167  | **    | 0.093  | 0.083 | 0.290 | ***   | 0.337  | ***   |
|                     | VSIG4        | 0.173  | ***   | 0.268  | ***   | 0.185  | ***   | 0.120  | 0.026 | 0.244 | ***   | 0.280  | ***   |
|                     | MS4A4A       | 0.196  | ***   | 0.307  | ***   | 0.170  | **    | 0.099  | 0.065 | 0.271 | ***   | 0.324  | ***   |
| Neutrophils         | CEACAM8      | 0.083  | 0.112 | 0.095  | 0.078 | -0.073 | 0.161 | -0.087 | 0.108 | 0.066 | 0.205 | 0.055  | 0.312 |
|                     | ITGAM        | 0.282  | ***   | 0.345  | ***   | 0.222  | ***   | 0.185  | ***   | 0.370 | ***   | 0.406  | ***   |
|                     | CCR7         | 0.072  | 0.166 | 0.156  | **    | 0.087  | 0.095 | -0.022 | 0.679 | 0.181 | ***   | 0.201  | ***   |
| Natural killer cell | KIR2DL1      | -0.058 | 0.266 | -0.087 | 0.108 | 0.055  | 0.289 | 0.015  | 0.780 | 0.074 | 0.155 | 0.052  | 0.335 |
|                     | KIR2DL3      | 0.070  | 0.176 | 0.117  | *     | 0.202  | ***   | 0.151  | **    | 0.091 | 0.080 | 0.109  | *     |
|                     | KIR2DL4      | 0.124  | *     | 0.156  | **    | 0.169  | **    | 0.129  | *     | 0.113 | *     | 0.116  | *     |
|                     | KIR3DL1      | 0.003  | 0.956 | 0.034  | 0.524 | 0.079  | 0.129 | 0.049  | 0.369 | 0.092 | 0.076 | 0.096  | 0.075 |

|                   |          |        |       |        |       |       |       |        |       |       |       |       |       |
|-------------------|----------|--------|-------|--------|-------|-------|-------|--------|-------|-------|-------|-------|-------|
|                   | KIR3DL2  | 0.056  | 0.279 | 0.098  | 0.068 | 0.063 | 0.226 | 0.027  | 0.614 | 0.111 | *     | 0.127 | *     |
|                   | KIR3DL3  | 0.042  | 0.422 | 0.032  | 0.551 | 0.051 | 0.326 | 0.027  | 0.623 | 0.044 | 0.403 | 0.014 | 0.795 |
|                   | KIR2DS4  | 0.053  | 0.307 | 0.050  | 0.350 | 0.115 | *     | 0.095  | 0.079 | 0.088 | 0.090 | 0.086 | 0.111 |
| Dendritic cell    | HLA-DPB1 | 0.226  | ***   | 0.323  | ***   | 0.205 | ***   | 0.117  | *     | 0.222 | ***   | 0.242 | ***   |
|                   | HLA-DQB1 | 0.138  | **    | 0.211  | ***   | 0.133 | *     | 0.044  | 0.415 | 0.157 | **    | 0.162 | **    |
|                   | HLA-DRA  | 0.230  | ***   | 0.329  | ***   | 0.210 | ***   | 0.131  | *     | 0.290 | ***   | 0.327 | ***   |
|                   | HLA-DPA1 | 0.211  | ***   | 0.305  | ***   | 0.176 | ***   | 0.088  | 0.104 | 0.272 | ***   | 0.306 | ***   |
|                   | CD1C     | 0.181  | ***   | 0.236  | ***   | 0.029 | 0.583 | -0.058 | 0.282 | 0.240 | ***   | 0.239 | ***   |
|                   | NRP1     | 0.421  | ***   | 0.433  | ***   | 0.100 | 0.055 | 0.062  | 0.253 | 0.500 | ***   | 0.506 | ***   |
|                   | ITGAX    | 0.270  | ***   | 0.373  | ***   | 0.131 | *     | 0.049  | 0.360 | 0.409 | ***   | 0.458 | ***   |
| Th1               | TBX21    | 0.041  | 0.428 | 0.119  | *     | 0.128 | *     | 0.028  | 0.608 | 0.162 | **    | 0.184 | ***   |
|                   | STAT4    | 0.098  | 0.059 | 0.138  | *     | 0.083 | 0.111 | 0.042  | 0.438 | 0.197 | ***   | 0.209 | ***   |
|                   | STAT1    | 0.384  | ***   | 0.433  | ***   | 0.137 | **    | 0.090  | 0.094 | 0.450 | ***   | 0.468 | ***   |
|                   | IFNG     | 0.148  | **    | 0.222  | ***   | 0.139 | **    | 0.084  | 0.122 | 0.142 | **    | 0.167 | **    |
|                   | TNF      | 0.221  | ***   | 0.329  | ***   | 0.144 | **    | 0.052  | 0.334 | 0.329 | ***   | 0.382 | ***   |
| Th2               | GATA3    | 0.128  | *     | 0.235  | ***   | 0.122 | *     | 0.023  | 0.674 | 0.232 | ***   | 0.285 | ***   |
|                   | STAT6    | 0.257  | ***   | 0.247  | ***   | 0.159 | **    | 0.132  | *     | 0.390 | ***   | 0.374 | ***   |
|                   | STAT5A   | 0.350  | ***   | 0.392  | ***   | 0.262 | ***   | 0.230  | ***   | 0.369 | ***   | 0.385 | ***   |
|                   | IL13     | -0.035 | 0.506 | -0.039 | 0.467 | 0.166 | **    | 0.149  | **    | 0.014 | 0.789 | 0.005 | 0.928 |
| Tfh               | BCL6     | 0.289  | ***   | 0.278  | ***   | 0.014 | 0.781 | 0.017  | 0.749 | 0.340 | ***   | 0.332 | ***   |
|                   | IL21     | 0.073  | 0.163 | 0.104  | 0.053 | 0.150 | **    | 0.126  | *     | 0.081 | 0.118 | 0.096 | 0.075 |
| Th17              | STAT3    | 0.214  | ***   | 0.243  | ***   | 0.094 | 0.070 | 0.051  | 0.348 | 0.417 | ***   | 0.431 | ***   |
|                   | IL17A    | 0.039  | 0.452 | 0.042  | 0.442 | -0.08 | 0.122 | -0.069 | 0.204 | 0.108 | *     | 0.109 | *     |
| Treg              | FOXP3    | 0.084  | 0.105 | 0.119  | *     | 0.199 | ***   | 0.171  | **    | 0.258 | ***   | 0.276 | ***   |
|                   | CCR8     | 0.271  | ***   | 0.353  | ***   | 0.060 | 0.250 | -0.008 | 0.886 | 0.488 | ***   | 0.543 | ***   |
|                   | STAT5B   | 0.356  | ***   | 0.337  | ***   | 0.029 | 0.582 | 0.048  | 0.373 | 0.533 | ***   | 0.540 | ***   |
|                   | TGFB1    | 0.325  | ***   | 0.426  | ***   | 0.066 | 0.204 | -0.025 | 0.646 | 0.306 | ***   | 0.338 | ***   |
| T cell exhaustion | PDCD1    | 0.226  | ***   | 0.318  | ***   | 0.129 | *     | 0.038  | 0.479 | 0.201 | ***   | 0.209 | ***   |
|                   | CTLA4    | 0.212  | ***   | 0.294  | ***   | 0.063 | 0.228 | -0.013 | 0.808 | 0.191 | ***   | 0.214 | ***   |
|                   | LAG3     | 0.139  | **    | 0.181  | ***   | 0.157 | **    | 0.114  | *     | 0.102 | *     | 0.101 | 0.062 |
|                   | HAVCR2   | 0.291  | ***   | 0.424  | ***   | 0.173 | ***   | 0.100  | 0.065 | 0.344 | ***   | 0.407 | ***   |
|                   | GZMB     | 0.065  | 0.211 | 0.104  | 0.053 | 0.188 | ***   | 0.117  | *     | 0.054 | 0.296 | 0.044 | 0.415 |
